# Supplementary material for: Performance of immune-based and microbiological tests in children with tuberculosis meningitis in Europe: a multicentre Paediatric Tuberculosis Network European Trials Group (ptbnet) study
Source: PubMed Central journal article supplement (PMC7330130; doi:10.1183/13993003.02004-2019), 2020-07-02
Supplement: ERJ-02004-2019.Shareable.pdf [file ERJ-02004-2019.Shareable.pdf]

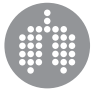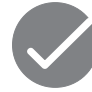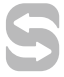

SHAREABLE PDF

# Performance of immune-based and microbiological tests in children with tuberculosis meningitis in Europe: a multicentre Paediatric Tuberculosis Network European Trials Group (ptbnet) study

Robindra Basu Roy<sup>1,21</sup>, Stephanie Thee<sup>2,21</sup>, Daniel Blázquez-Gamero<sup>3</sup>, Lola Falcón-Neyra<sup>4</sup>, Olaf Neth<sup>4</sup>, Antoni Noguera-Julian<sup>5,6,7,8</sup>, Cristina Lillo<sup>3</sup>, Luisa Galli<sup>9,10</sup>, Elisabetta Venturini<sup>9,10</sup>, Danilo Buonsenso<sup>11</sup>, Florian Götzinger<sup>12</sup>, Nuria Martínez-Alier<sup>13</sup>, Svetlana Velizarova<sup>14</sup>, Folke Brinkmann<sup>15</sup>, Steven B. Welch<sup>16</sup>, Maria Tsolia<sup>17</sup>, Begoña Santiago-García<sup>18</sup>, Renate Krüger<sup>2</sup> and Marc Tebruegge<sup>13,19,20</sup>, on behalf of the ptbnet TB Meningitis Study Group<sup>22</sup>

**Affiliations:** <sup>1</sup>Clinical Research Dept, London School of Hygiene and Tropical Medicine, London, UK. <sup>2</sup>Dept of Pediatric Pneumology, Immunology and Intensive Care, Charité–Universitätsmedizin Berlin, Berlin, Germany. <sup>3</sup>Paediatric Infectious Diseases Unit, Hospital Universitario 12 de Octubre, Universidad Complutense de Madrid, Instituto de Investigación Hospital Universitario 12 de Octubre (imas12), RITIP, Madrid, Spain. <sup>4</sup>Paediatric Infectious Diseases, Rheumatology and Immunology Unit, Hospital Universitario Virgen del Rocío, Institute of Biomedicine, Seville, Spain. <sup>5</sup>Malalties Infeccioses i Resposta Inflammatory Sistèmica en Pediatria, Institut de Recerca Pediàtrica; Hospital Sant Joan de Déu, Barcelona, Spain. <sup>6</sup>Departament de Pediatria, Universitat de Barcelona, Barcelona, Spain. <sup>7</sup>CIBER de Epidemiologia y Salud Pública, CIBERESP, Madrid, Spain. <sup>8</sup>Red de Investigación Translacional en Infectología Pediátrica, RITIP, Madrid, Spain. <sup>9</sup>Dept of Health Sciences, University of Florence, Florence, Italy. <sup>10</sup>Paediatric Infectious Disease Unit, Meyer Children's University Hospital, Florence, Italy. <sup>11</sup>Dept of Woman and Child Health and Public Health, Fondazione Policlinico Universitario A. Gemelli IRCCS, Rome, Italy. <sup>12</sup>Dept of Paediatrics and Adolescent Medicine, Wilhelminenspital, Vienna, Austria. <sup>13</sup>Dept of Paediatric Infectious Diseases and Immunology, Evelina London Children's Hospital, Guy's and St. Thomas' NHS Foundation Trust, London, UK. <sup>14</sup>Dept of Pulmonary Diseases, Medical University, Hospital for Lung Diseases 'St. Sofia', Sofia, Bulgaria. <sup>15</sup>Dept of Paediatric Pulmonology, Ruhr University Bochum, Bochum, Germany. <sup>16</sup>Birmingham Chest Clinic and Heartlands Hospital, University Hospitals Birmingham, Birmingham, UK. <sup>17</sup>Second Dept of Paediatrics, National and Kapodistrian University of Athens, School of Medicine, P. and A. Kyriakou Children's Hospital, Athens, Greece. <sup>18</sup>Dept of Paediatric Infectious Diseases, Hospital General Universitario Gregorio Marañón, Madrid, Spain. <sup>19</sup>Dept of Paediatrics, Royal Children's Hospital Melbourne, University of Melbourne, Melbourne, Australia. <sup>20</sup>Dept of Infection, Immunity and Inflammation, UCL Great Ormond Street Institute of Child Health, University College London, London, UK. <sup>21</sup>Joint first authors. <sup>22</sup>A list of the ptbnet TB Meningitis Study Group Collaborators can be found in the acknowledgements section.

**Correspondence:** Marc Tebruegge, Dept of Infection, Immunity and Inflammation, UCL Great Ormond Street Institute of Child Health, University College London, 30 Guildford Street, London WC1N 1EH, UK. E-mail: m.tebruegge@ucl.ac.uk

@ERSpublications

All existing immunological and microbiological TB tests have suboptimal sensitivity in children with TBM. Combining immune-based tests with CSF culture and PCR results in far higher positive diagnostic yields, and should therefore be standard practice. <http://bit.ly/2TSAARl>

**Cite this article as:** Basu Roy R, Thee S, Blázquez-Gamero D, *et al.* Performance of immune-based and microbiological tests in children with tuberculosis meningitis in Europe: a multicentre Paediatric Tuberculosis Network European Trials Group (ptbnet) study. *Eur Respir J* 2020; 56: 1902004 [https://doi.org/10.1183/13993003.02004-2019].

This single-page version can be shared freely online.

#### ABSTRACT

**Introduction:** Tuberculous meningitis (TBM) is often diagnostically challenging. Only limited data exist on the performance of interferon- $\gamma$  release assays (IGRA) and molecular assays in children with TBM in routine clinical practice, particularly in the European setting.

**Methods:** Multicentre, retrospective study involving 27 healthcare institutions providing care for children with tuberculosis (TB) in nine European countries.

**Results:** Of 118 children included, 54 (45.8%) had definite, 38 (32.2%) probable and 26 (22.0%) possible TBM; 39 (33.1%) had TBM grade 1, 68 (57.6%) grade 2 and 11 (9.3%) grade 3. Of 108 patients who underwent cranial imaging 90 (83.3%) had at least one abnormal finding consistent with TBM. At the 5-mm cut-off the tuberculin skin test had a sensitivity of 61.9% (95% CI 51.2–71.6%) and at the 10-mm cut-off 50.0% (95% CI 40.0–60.0%). The test sensitivities of QuantiFERON-TB and T-SPOT.TB assays were 71.7% (95% CI 58.4–82.1%) and 82.5% (95% CI 58.2–94.6%), respectively ( $p=0.53$ ). Indeterminate results were common, occurring in 17.0% of QuantiFERON-TB assays performed. Cerebrospinal fluid (CSF) cultures were positive in 50.0% (95% CI 40.1–59.9%) of cases, and CSF PCR in 34.8% (95% CI 22.9–43.7%). In the subgroup of children who underwent tuberculin skin test, IGRA, CSF culture and CSF PCR simultaneously, 84.4% had at least one positive test result (95% CI 67.8%–93.6%).

**Conclusions:** Existing immunological and microbiological TB tests have suboptimal sensitivity in children with TBM, with each test producing false-negative results in a substantial proportion of patients. Combining immune-based tests with CSF culture and CSF PCR results in considerably higher positive diagnostic yields, and should therefore be standard clinical practice in high-resource settings.
